# Supplementary material for: Scavenging Capacity of Marine Carotenoids against Reactive Oxygen and Nitrogen Species in a Membrane-Mimicking System
Source: Mar Drugs. 2012 Aug 20;10(8):1784–98. doi: 10.3390/md10081784 (PMC3447262; doi:10.3390/md10081784)

## Supplementary Materials

**Figure S1.** Decay curves of the probe C<sub>11</sub>-BODIPY<sup>581/591</sup> fluorescence using different concentrations of hydroxyl radical generators (HO•) and different concentrations of hypochlorous acid (HOCl) and anion peroxynitrite (ONOO<sup>-</sup>). The red line corresponds to the chosen concentrations.

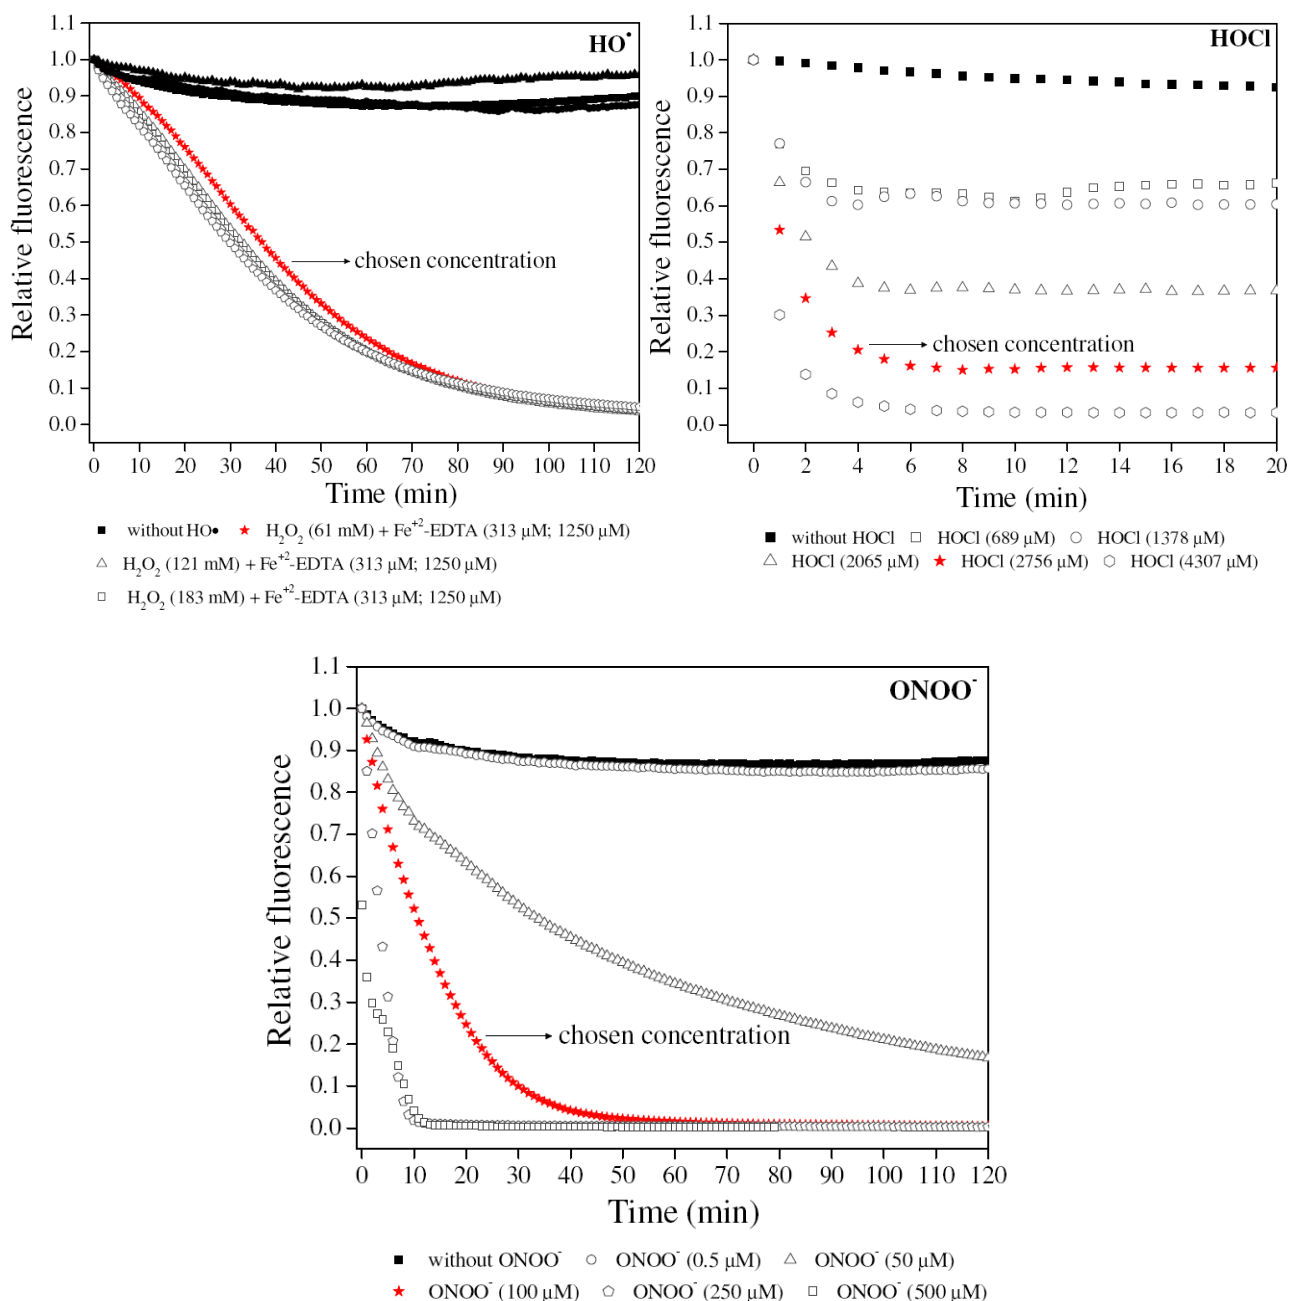

Supplement: Supplementary File 1: — PDF-Document (PDF, 241 KB) [file marinedrugs-10-01784-s001.pdf]
